# Supplementary material
Source: PubMed Central journal article supplement (PMC8613977)
Supplement: mmc1.pdf [file mmc1.pdf]

**Tabla S1**

|                                 |                                                                                                                                             |
|---------------------------------|---------------------------------------------------------------------------------------------------------------------------------------------|
| <b>Vehicle failure</b>          | Disfunction of the vehicle engine, electrical or oxygen supply that implies significant delay in transport or ambulance change.             |
| <b>Pump failure</b>             | Disfunction of the ECMO centrifugal pump, requiring pump change                                                                             |
| <b>Oxygenator failure</b>       | Rapid loss of the oxygenation capability of the membrane associated to a decrease in patient's oxygen saturation measured by pulse-oximetry |
| <b>Console failure</b>          | Disfunction of the console that impedes measurements of circuit pressures, flow velocity, or adjustment of the pump's speed.                |
| <b>Air in circuit</b>           | Presence of air bubbles in lines, pump or oxygenator with drop in blood flow                                                                |
| <b>Ventilator failure</b>       | Disfunction of the ventilator to deliver air to the circuit or to measure pressure, flow or volume during the respiratory cycle.            |
| <b>Bleeding</b>                 | Bleeding of the surgical site of cannulation considered as significant by the attending physician                                           |
| <b>Decrease in tidal volume</b> | Decrease in tidal volume over 2 ml / kg of predicted body weight after the start of ultra-protective ventilation                            |

|                                |                                                                                                                                                                                                           |
|--------------------------------|-----------------------------------------------------------------------------------------------------------------------------------------------------------------------------------------------------------|
| <b>Hemodynamic instability</b> | Persistent drop in systolic blood pressure below 90 mmHg or mean arterial pressure below 60 mmHg despite volume administration or need to increase noradrenaline infusion by more than 0.2 mcg / kg / min |
|--------------------------------|-----------------------------------------------------------------------------------------------------------------------------------------------------------------------------------------------------------|
